# Supplementary material for: Large-area fabrication of superhydrophobic micro-conical pillar arrays on various metallic substrates
Source: Royal Society of Chemistry journal article supplement (doi:10.1039/d1nr02924j), 2021-01-01
Supplement: d1nr02924j1.pdf [file d1nr02924j1.pdf]

## Supporting Information

### **Large-Area Fabrication of Superhydrophobic Micro-Conical Pillar Arrays on Various Metallic Substrates**

Weihaio Pan,<sup>a</sup> Song Wu,<sup>a</sup> Liu Huang,<sup>a</sup> and Jinlong Song<sup>\*a, b</sup>

<sup>a</sup> *Key Laboratory for Precision and Non-traditional Machining Technology of the Ministry of Education, Dalian University of Technology, Dalian 116024, P. R. China.*

<sup>b</sup> *Key Laboratory for Micro/Nano Technology and System of Liaoning Province, Dalian University of Technology, Dalian, Liaoning 116024, P. R. China.*

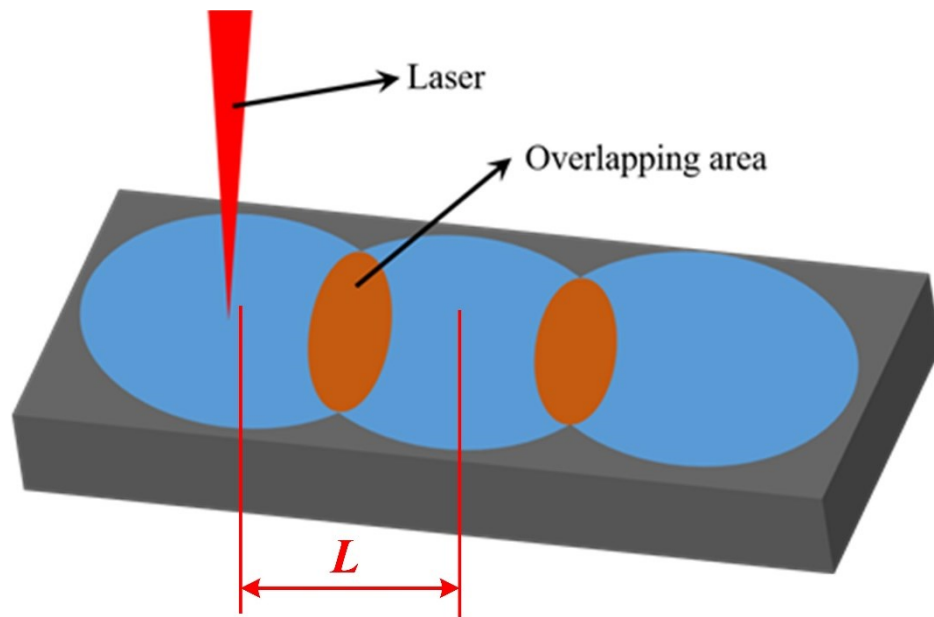

**Fig. S1** Schematic of the overlapping area during the laser ablation process.

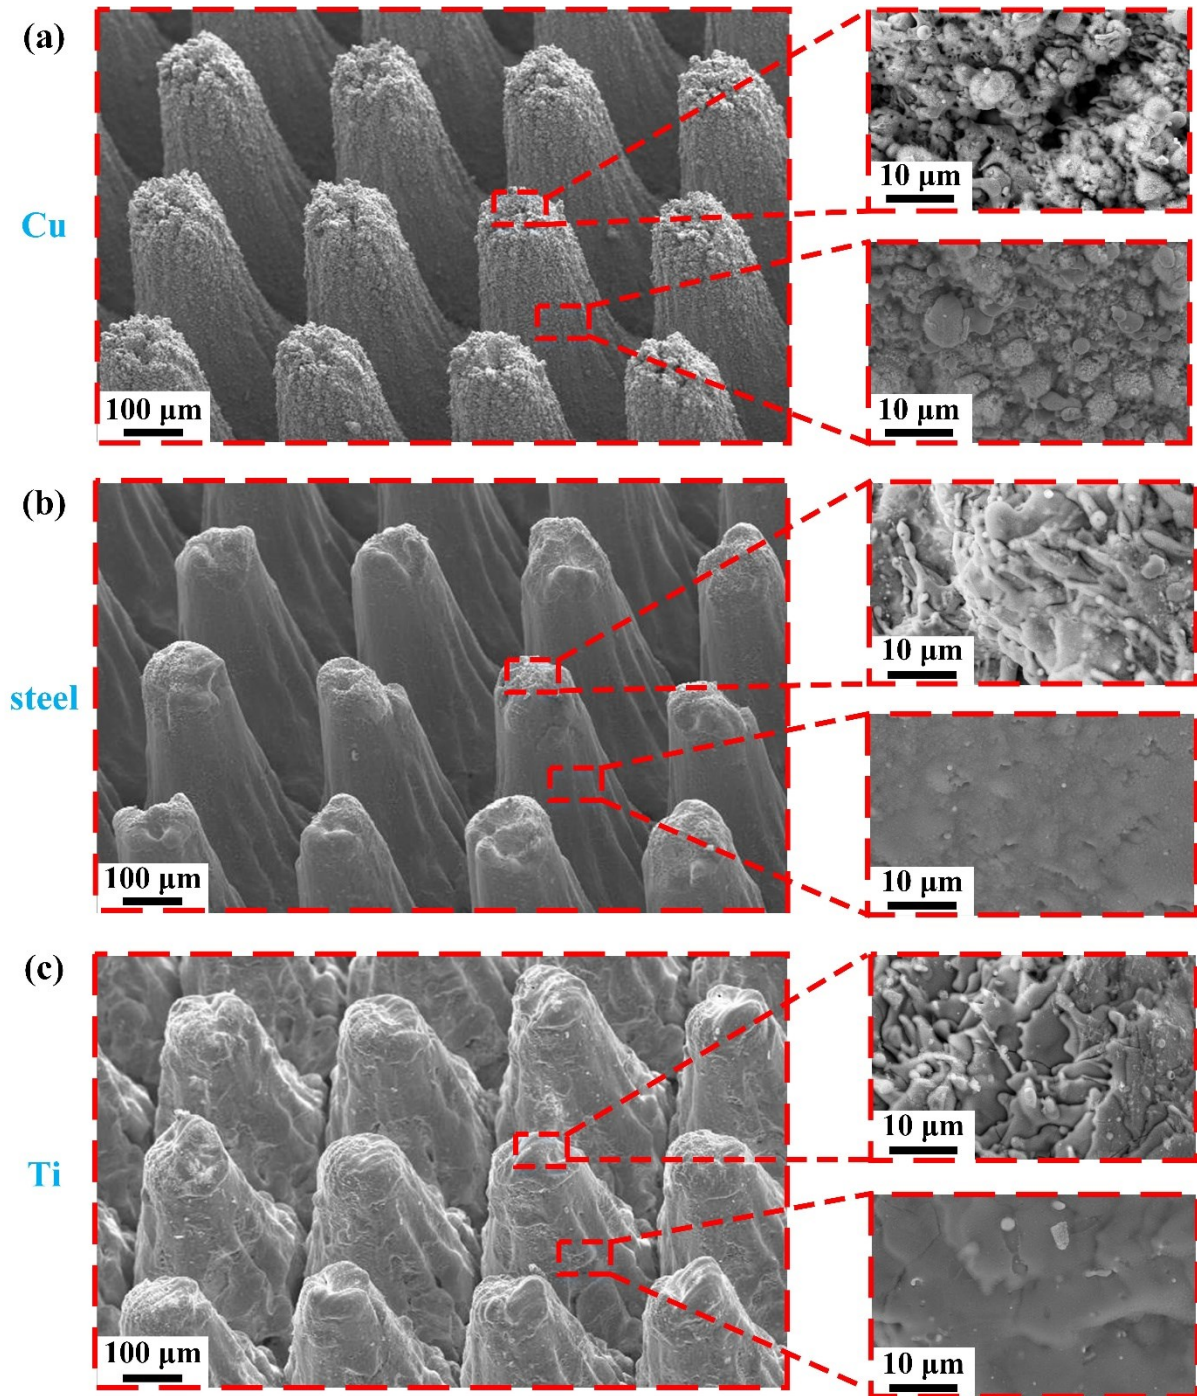

**Fig. S2** Surface morphology of micro-conical pillar arrays on Cu (a), steel (b), and Ti (c) substrates fabricated by the nanosecond laser ablation at the power of 21 W, scanning time of 200 mm/s, frequency of 20 kHz, and scanning times of 80 cycles. It can be easily found that the whole sidewall and top region of micro-conical pillar arrays on these three metallic substrates were very rough and covered with protrusions of several micrometers in diameter, which were very similar to the surface microstructures in Figure 2(a2) constructed by first nanosecond laser ablation.

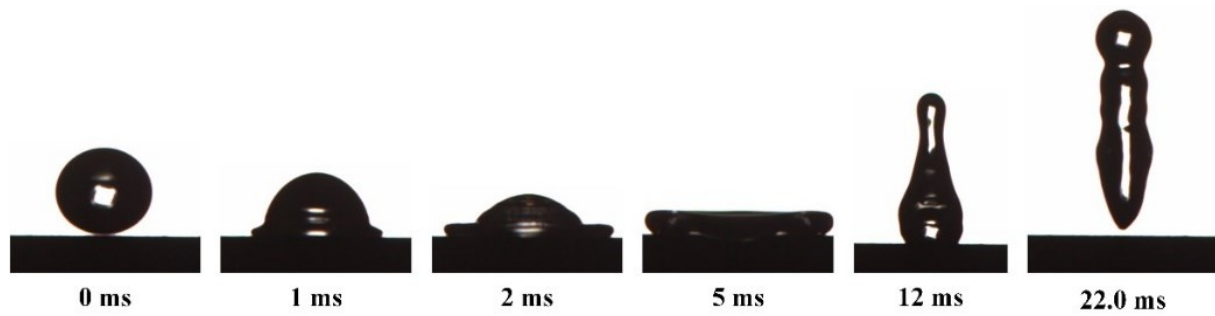

**Fig. S3** Selected snapshots captured by the high-speed camera showing a water droplet (14.1  $\mu\text{L}$ ) impinging on the superhydrophobic flat surface at  $We = 16.7$ . The fabrication processes of superhydrophobic flat surface are as follows. The Al plate was ultrasonically cleaned with ethanol, acetone, and deionized water. Then, the sample was ablated by the nanosecond laser at a power of at the power of 21 W, scanning speed of 200 mm/s, and frequency of 20 kHz. Thereafter, the samples were washed by deionized water and dried. Then, the samples were modified through immersion in a 1 wt% solution of FAS in ethanol for  $\sim 40$  minutes and dried at  $\sim 60$   $^{\circ}\text{C}$  for  $\sim 1$  h. Thus, a superhydrophobic flat Al plate was obtained. The water droplet shows a conventional bouncing processes with the contact time  $t_c$  of  $\sim 22.0$  ms.

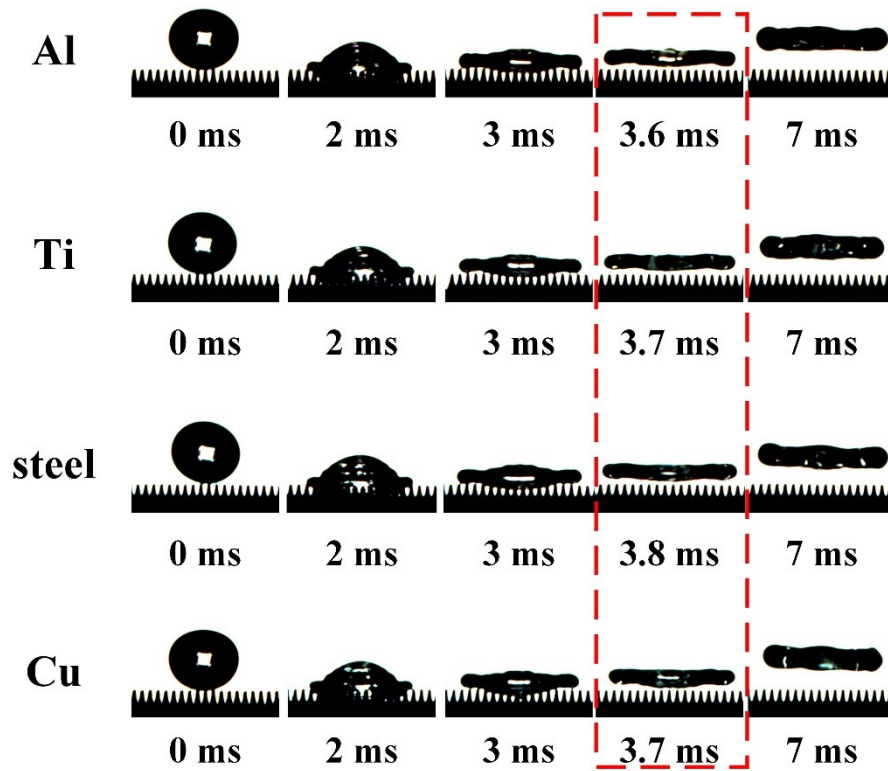

**Fig. S4** Selected snapshots captured by the high-speed camera showing a water droplet ( $14.1 \mu\text{L}$ ) impinging on superhydrophobic micro-conical pillar arrays on Al, Ti, steel, and Cu substrates ( $D = 150 \mu\text{m}$ ,  $H = 650 \mu\text{m}$ , and  $S = 200 \mu\text{m}$ ) at  $We = 16.7$ . It can be found that the contact time  $t_c$  was  $\sim 3.7$  ms for these four metallic arrays, which demonstrated that the substrate materials have little influence on the dynamic bouncing processes of the water droplet.

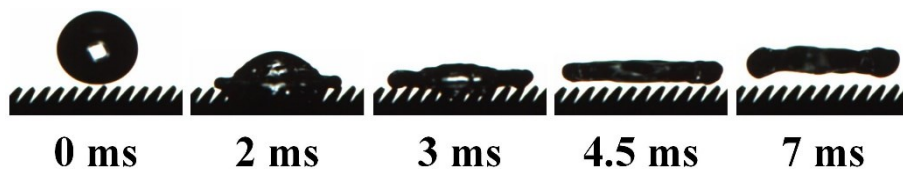

**Fig. S5** Selected snapshots captured by the high-speed camera showing a water droplet ( $14.1 \mu\text{L}$ ) impinging on superhydrophobic micro-conical pillar arrays with pillar inclination angle  $\beta = 45^\circ$  ( $D = 250 \mu\text{m}$ ,  $H = 750 \mu\text{m}$ , and  $S = 200 \mu\text{m}$ ) at  $We = 16.7$ . It can be found that the water droplet detected from the arrays with a contact time  $t_c$  of  $\sim 4.5$  ms and  $Q$  of 0.98, which was corresponding to the pancake bouncing processes.

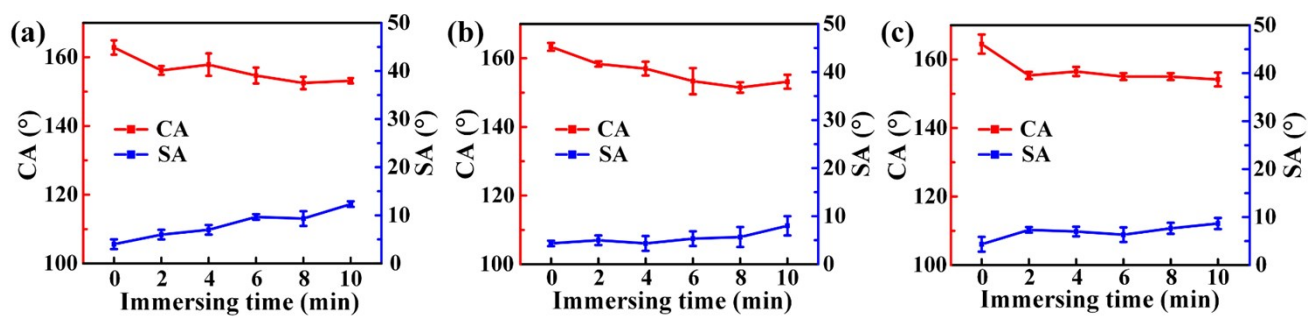

**Fig. S6** Variations of the CA and SA with the immersing time inside the (a) acid (pH = 1), (b) base (pH = 13), and (c) 0.1 M NaCl aqueous solution.

### **Video S1**

Simulation of the nanosecond laser fabrication processes of single micro-conical pillar at  $P = 6 \text{ W}$  and  $t = 40 \text{ }\mu\text{s}$ .

### **Video S2**

The bouncing processes of a water droplet ( $14.1 \text{ }\mu\text{L}$ ) impinging on a superhydrophobic flat surface at  $We=16.7$ . The water droplet shows a conventional bouncing processes with the contact time  $t_c$  of  $\sim 22.0 \text{ ms}$ .

### **Video S3**

The bouncing processes of a water droplet ( $14.1 \text{ }\mu\text{L}$ ) impinging on superhydrophobic micro-conical pillar arrays with different pillar height  $H$  ( $D = 150 \text{ }\mu\text{m}$  and  $S = 300 \text{ }\mu\text{m}$ ) at  $We = 16.7$ . For  $H = 390 \text{ }\mu\text{m}$ ,  $600 \text{ }\mu\text{m}$ , and  $750 \text{ }\mu\text{m}$ , the water droplet shows a typical pancake bouncing processes with the contact time  $t_c$  of  $3.5 \text{ ms}$ ,  $3.4 \text{ ms}$ , and  $3.5 \text{ ms}$ , respectively. However, when  $H = 160 \text{ }\mu\text{m}$ , the water droplet shows a conventional bouncing processes with the contact time  $t_c$  of  $\sim 14.9 \text{ ms}$ .

### **Video S4**

The bouncing processes of a water droplet ( $14.1 \text{ }\mu\text{L}$ ) impinging on superhydrophobic micro-conical pillar arrays with different top diameter  $D$  ( $H = 685 \text{ }\mu\text{m}$  and  $S = 300 \text{ }\mu\text{m}$ ) at  $We = 16.7$ . For  $D = 100 \text{ }\mu\text{m}$ ,  $400 \text{ }\mu\text{m}$ , and  $550 \text{ }\mu\text{m}$ , the water droplet shows a typical pancake bouncing processes with the contact time  $t_c$  of  $5.5 \text{ ms}$ ,  $4.2 \text{ ms}$ , and  $5.5 \text{ ms}$ , respectively. However, when  $D = 850 \text{ }\mu\text{m}$ , the water droplet shows a conventional bouncing processes with the contact time  $t_c$  of  $\sim 13.4 \text{ ms}$ .

### **Video S5**

The bouncing processes of a water droplet ( $14.1 \text{ }\mu\text{L}$ ) impinging on superhydrophobic micro-conical pillar arrays with different pillar interval space  $S$  ( $D = 150 \text{ }\mu\text{m}$  and  $H = 685 \text{ }\mu\text{m}$ ) at  $We = 16.7$ . For  $S = 175 \text{ }\mu\text{m}$ ,  $325 \text{ }\mu\text{m}$ , and  $400 \text{ }\mu\text{m}$ , the water droplet shows a typical pancake bouncing processes with the contact time  $t_c$  of  $3.4 \text{ ms}$ ,  $5.1 \text{ ms}$ , and  $5.5 \text{ ms}$ , respectively. However, when  $D = 850 \text{ }\mu\text{m}$ , the water droplet shows a conventional bouncing processes with the

contact time  $t_c$  of  $\sim 15.0$  ms.

#### **Video S6**

The bouncing processes of a water droplet (14.1  $\mu\text{L}$ ) impinging on superhydrophobic micro-conical pillar arrays with pillar inclination angle  $\beta=45^\circ$  ( $D = 250 \mu\text{m}$ ,  $H = 750 \mu\text{m}$ , and  $S = 200 \mu\text{m}$ ) at  $We = 16.7$ . It can be found that the water droplet detected from the arrays with a contact time  $t_c$  of  $\sim 4.5$  ms and  $Q$  of 0.98, which was corresponding to the pancake bouncing processes.

#### **Video S7**

Sandpaper abrasion test of superhydrophobic micro-conical pillar arrays with  $D = 210 \mu\text{m}$ ,  $H = 685 \mu\text{m}$ , and  $S = 150 \mu\text{m}$ . After 10 m sandpaper abrasion under a 100 g weight, the arrays still showed superhydrophobicity.

#### **Video S8**

Chemical stability test of superhydrophobic micro-conical pillar arrays with  $D = 210 \mu\text{m}$ ,  $H = 685 \mu\text{m}$ , and  $S = 150 \mu\text{m}$ . The acid droplets (pH = 0, 2, 4), base droplets (pH = 10, 12, 14), and salt droplets (0.1 M) impinging on the arrays could easily roll off and without any residue.

#### **Video S9**

Anti-icing test of superhydrophobic micro-conical pillar arrays with  $D = 210 \mu\text{m}$ ,  $H = 685 \mu\text{m}$ , and  $S = 150 \mu\text{m}$ . A common Al plate with a flat surface and the superhydrophobic Al plate with micro-conical pillar arrays were fixed at a stage with a  $20^\circ$  tilted angle in the environment chamber with a temperature of  $-8^\circ\text{C}$ . The rain droplets with a temperature of  $2^\circ\text{C}$  were dropped on the samples in a flow rate of  $1260 \mu\text{L}/\text{min}$ . After raining for 20 min, the rain droplets adhered to the common Al surface with a flat surface and frozen into ice, while no ice was observed on the arrays.
